# Supplementary material for: Online Genetic Counseling as a Solution for Unmet Needs in Genetic Medicine: The First Survey in Japan
Source: Research Square preprint supplement (doi:10.21203/rs.3.rs-6174381/v1), 2025-03-11
Supplement: Supplementary file 1 [file 21b98c398c1f9bf5a5a7971e.xlsx]

## Sheet: Supplementary table 1
Supplementary table 1. Communication devices and connection quality (OGC group only)
		n (%)
Q1. The communication device was delivered to my home without any issues.
	Strongly agree	2	(13.3)
	Agree	1	(6.7)
	Neutral	2	(13.3)
	Disagree	1	(6.7)
	Strongly disagree	2	(13.3)
	Not specified	7	(46.7)
Q2. The communication device was easy to use.
	Strongly agree	4	(26.7)
	Agree	2	(13.3)
	Neutral	3	(20)
	Disagree	1	(6.7)
	Strongly disagree	0	(0)
	Not specified	5	(33.3)
Q3. During the online genetic counseling session, the counselor’s voice was clear.
	Strongly agree	4	(26.7)
	Agree	9	(60)
	Neutral	1	(6.7)
	Disagree	0	(0)
	Strongly disagree	0	(0)
	Not specified	1	(6.7)
Q4. The screen was stable during the online genetic counseling session.
	Strongly agree	5	(33.3)
	Agree	8	(53.3)
	Neutral	0	(0)
	Disagree	1	(6.7)
	Strongly disagree	0	(0)
	Not specified	1	(6.7)
Q5. I felt comfortable asking questions during the online genetic counseling session.
	Strongly agree	8	(53.3)
	Agree	5	(33.3)
	Neutral	1	(6.7)
	Disagree	0	(0)
	Strongly disagree	0	(0)
	Not specified	1	(6.7)
Q6. I was concerned about the risk of personal information being leaked during the session.
	Strongly agree	1	(6.7)
	Agree	0	(0)
	Neutral	2	(13.3)
	Disagree	5	(33.3)
	Strongly disagree	6	(40)
	Not specified	1	(6.7)
Q7. Returning the communication device was easy.
	Strongly agree	0	(0)
	Agree	1	(6.7)
	Neutral	4	(26.7)
	Disagree	0	(0)
	Strongly disagree	1	(6.7)
	Not specified	9	(60)
OGC, online genetic counseling.
