# Supplementary material for: Online Genetic Counseling as a Solution for Unmet Needs in Genetic Medicine: The First Survey in Japan
Source: Research Square preprint supplement (doi:10.21203/rs.3.rs-6174381/v1), 2025-03-11
Supplement: Supplementary file 1 [file 1469324ec004521f5f75c759.pdf]

## Questionnaire for online genetic counseling

- The results of this survey will be used solely for the purpose of improving the quality of online genetic counseling.
- This survey is not intended to identify individuals.
- After completing the questionnaire, please place it in the enclosed return envelope and mail it anonymously.

Date of Completion: Year \_\_\_\_\_ Month \_\_\_\_\_ Day \_\_\_\_\_

**Please circle the most applicable options or fill in the blanks as appropriate.**

**Gender:** Male / Female

**Age:** 20s / 30s / 40s / 50s / 60s / 70 or older

**Consultation Topic:** Hereditary hearing loss / Hereditary retinal disease / Hereditary cancer  
Congenital pediatric disorders / Other (\_\_\_\_\_)

**Relationship to the Individual with Symptoms:**

Self / Parent / Child / Sibling / Grandparent / Cousin / Other (\_\_\_\_\_)

**Number of Genetic Counseling Sessions:** First / Second / Third / Fourth or more

**Travel Time to the Hospital:** Under 30 minutes / 30-60 minutes / 1-2 hours / Over 2 hours

**(1) Please circle the number that best applies to you.**

|                                                                                                   | Strongly Agree | Agree | Neutral | Disagree | Strongly Disagree |
|---------------------------------------------------------------------------------------------------|----------------|-------|---------|----------|-------------------|
| <b>Regarding Genetic Counseling</b>                                                               |                |       |         |          |                   |
| Q1. I understood my genetic risks even before the counseling session.                             | 1              | 2     | 3       | 4        | 5                 |
| Q2. The counselor introduced themselves and explained their role before starting the session.     | 1              | 2     | 3       | 4        | 5                 |
| Q3. The counselor listened to and respected the information I provided.                           | 1              | 2     | 3       | 4        | 5                 |
| Q4. The counselor provided the information I needed.                                              | 1              | 2     | 3       | 4        | 5                 |
| Q5. The counselor appropriately answered my questions.                                            | 1              | 2     | 3       | 4        | 5                 |
| Q6. Personal information about me and my family was kept confidential.                            | 1              | 2     | 3       | 4        | 5                 |
| Q7. I am satisfied with the advice I received today.                                              | 1              | 2     | 3       | 4        | 5                 |
| Q8. I would recommend this genetic counseling session to other family members.                    | 1              | 2     | 3       | 4        | 5                 |
| Q9. If possible, I would prefer to have in-person genetic counseling for the next session.        | 1              | 2     | 3       | 4        | 5                 |
| Q10. I believe that satisfaction levels for online and in person genetic counseling are the same. | 1              | 2     | 3       | 4        | 5                 |
| Q11. Overall, I am satisfied with today's genetic counseling session.                             | 1              | 2     | 3       | 4        | 5                 |

|                                                                                             | Strongly Agree | Agree | Neutral | Disagree | Strongly Disagree |
|---------------------------------------------------------------------------------------------|----------------|-------|---------|----------|-------------------|
| <b>Regarding Communication Devices and Connection Quality</b>                               |                |       |         |          |                   |
| Q1. The communication device was delivered to my home without any issues.                   | 1              | 2     | 3       | 4        | 5                 |
| Q2. The communication device was easy to use.                                               | 1              | 2     | 3       | 4        | 5                 |
| Q3. During the online genetic counseling session, the counselor's voice was clear.          | 1              | 2     | 3       | 4        | 5                 |
| Q4. The screen was stable during the online genetic counseling session.                     | 1              | 2     | 3       | 4        | 5                 |
| Q5. I felt comfortable asking questions during the online genetic counseling session.       | 1              | 2     | 3       | 4        | 5                 |
| Q6. I was concerned about the risk of personal information being leaked during the session. | 1              | 2     | 3       | 4        | 5                 |
| Q7. Returning the communication device was easy.                                            | 1              | 2     | 3       | 4        | 5                 |

**(2) Compared to in-person genetic counseling, if you noticed any advantages or disadvantages of online genetic counseling, please share them freely.**

**(3) Please feel free to share your thoughts and requests regarding today's genetic counseling session.**

Thank you very much for your cooperation.
