# Supplementary material for: Online Genetic Counseling as a Solution for Unmet Needs in Genetic Medicine: The First Survey in Japan
Source: Research Square preprint supplement (doi:10.21203/rs.3.rs-6174381/v1), 2025-03-11
Supplement: Supplementary file 2 [file b9ee4310ebac0f21261ff1eb.xlsx]

## Sheet: Table 2
Table 2. Categorical classification of advantages and disadvantages in OGC and IPGC
	OGC	IPGC
Advantege	Easy access even from remote areas (6)	Emotions, facial expressions, and atmosphere are easily conveyed (5)
	Saves time (5)	Smooth communication (4)
	Good communication possible (5)	No communication setup or technical issues (3)
	No need to travel (4)	Provides a sense of security (3)
	Easy to receive genetic counseling (3)	Easy to ask questions (1)
	No risk of infection (2)	Physical examination possible (1)
	Saves money (2)	No inconvenience with in person genetic counseling (1)
	Easier for family to join (1)	Blood tests can be done on the same day (1)
		Easier to speak honestly (1)
		Can view materials while listening to explanations (1)
Disadvantage	Difficulty ensuring privacy protection (2)	Takes time to visit the hospital (2)
	Problems accessing online systems (1)	Risk of infectious diseases (1)
	Difficulty in communication (1)
	Unable to perform physical examinations (1)
	Blood tests not possible on the same day (1)
	Some topics may not be suitable (1)
	Lack of awareness among healthcare providers (1)
	Materials hard to see on device screens (1)
Numbers in parentheses indicate the number of respondents.
OGC, online genetic counseling; IPGC, in-person genetic counseling.
