# Supplementary material for: Online Genetic Counseling as a Solution for Unmet Needs in Genetic Medicine: The First Survey in Japan
Source: Research Square preprint supplement (doi:10.21203/rs.3.rs-6174381/v1), 2025-03-11
Supplement: Supplementary file 3 [file c24241c57679d34b6e367797.xlsx]

## Sheet: Table 1
Table 1. Participant demographic characteristics
		OGC (n=15)			IPGC (n=34)			p value
Gender, n (%)								0.244
	Male	5	(33.3)		5	(14.7)
	Female	9	(60)		26	(76.5)
	Not specified	1	(6.7)		3	(8.8)
Age, n (%)								0.062
	20s	5	(33.3)		3	(8.8)
	30s	3	(20)		6	(17.6)
	40s	4	(26.7)		12	(35.3)
	50s	2	(13.3)		10	(29.4)
	60s	0	(0)		3	(8.8)
	70s or older	1	(6.7)		0	(0)
	Not specified	0	(0)		0	(0)
Consultation content, n (%)								0.132
	Hereditary hearing loss	2	(13.3)		3	(8.8)
	Hereditary retinal disease	5	(33.3)		2	(5.9)
	Hereditary cancer	5	(33.3)		19	(55.9)
	Congenital pediatric disorders	1	(6.7)		3	(8.8)
	Others	1	(6.7)		3	(8.8)
	Not specified	1	(6.7)		4	(11.8)
Relationship to the proband, n (%)								0.295
	Self	10	-55.5		28	-80
	Parent	2	-11.1		3	-8.6
	Child	4	-22.2		3	-8.6
	Sibling	0	(0)		0	(0)
	Grandparent	1	-5.6		1	-2.8
	Cousin	1	-5.6		0	(0)
	Others	0	(0)		0	(0)
	Not specified	0	(0)		0	(0)
Number of genetic counseling sessions, n (%)								0.459
	First	8	(53.3)		22	(64.7)
	Second	4	(26.7)		9	(26.5)
	Third	2	(13.3)		2	(5.9)
	Fourth or more	0	(0)		0	(0)
	Not specified	1	(6.7)		1	(2.9)
Travel time to the hospital, n (%)								0.003*
	Under 30 minutes	2	(13.3)		14	(41.2)
	30-60 minutes	3	(20)		13	(38.2)
	1-2 hours	2	(13.3)		7	(20.6)
	Over 2 hours	6	(40)		0	(0)
	Not specified	2	(13.3)		0	(0)
For the "Relationship to the proband" category, multiple responses were permitted.
OGC, online genetic counseling; IPGC, in-person genetic counseling; *p < 0.05.
